# Supplementary material for: Critical Role of Dynamic Flexibility in Ge‐Containing Zeolites: Impact on Diffusion
Source: PubMed Central journal article supplement — Chemistry. 2016 Jun 15;22(29):10036–43. doi: 10.1002/chem.201600983 (PMC6680141; doi:10.1002/chem.201600983), 2016-06-15
Supplement: CHEM-22-10036-s001.pdf [file CHEM-22-10036-s001.pdf]

# CHEMISTRY

## A **European** Journal

### Supporting Information

#### **Critical Role of Dynamic Flexibility in Ge-Containing Zeolites: Impact on Diffusion**

Juan José Gutiérrez-Sevillano,<sup>[a]</sup> Sofía Calero,\*<sup>[a]</sup> Said Hamad,<sup>[a]</sup> Ricardo Grau-Crespo,<sup>[b]</sup>  
Fernando Rey,\*<sup>[c]</sup> Susana Valencia,<sup>[c]</sup> Miguel Palomino,<sup>[c]</sup> Salvador R. G. Balestra,<sup>[a]</sup> and  
A. Rabdel Ruiz-Salvador\*<sup>[a]</sup>

chem\_201600983\_sm\_miscellaneous\_information.pdf  
chem\_201600983\_sm\_s0\_Si\_ITQ29.avi  
chem\_201600983\_sm\_s1\_SiGe\_ITQ29.avi  
chem\_201600983\_sm\_s2\_SiGe\_ITQ29.avi  
chem\_201600983\_sm\_s3\_SiGe\_ITQ29.avi

## Supporting Information

Email: [rual@upo.es](mailto:rual@upo.es) (A.R.R.-S.), [scalero@upo.es](mailto:scalero@upo.es) (S.C) and [frej@itq.upv.es](mailto:frej@itq.upv.es) (F.R.)

- Crystallographic data of the Si-ITQ-29 (S0) and SiGe-ITQ-29 (S1, S2 and S3) structures used in this work, given as CIF format.
- Arrhenius fit of the diffusion coefficients obtained at different temperatures for Si-ITQ-29 and SiGe-ITQ-29 frameworks
- Movies coming from ab-initio Molecular Dynamics simulations (AIMD) performed for Si-ITQ-29 and SiGe-ITQ-29 frameworks. External AVI files:
  - s0\_Si\_ITQ29.avi,
  - s1\_SiGe\_ITQ29.avi,
  - s2\_SiGe\_ITQ29.avi and
  - s3\_SiGe\_ITQ29.avi

## Crystallographic data of modeled S0 (Si-ITQ-29)

data\_s0

\_audit\_creation\_date 2015-07-30  
\_audit\_creation\_method 'VASP code'  
\_audit\_author\_name 'A. Rabdel Ruiz Salvador'

\_citation\_author\_name 'Juan José Gutiérrez-Sevillano, Sofía Calero, Said Hamad, Salvador R. G. Balestra, Ricardo Grau-Crespo, Fernando Rey, Susana Valencia, Miguel Palomino and A. Rabdel Ruiz-Salvador'

\_citation\_title 'Critical role of dynamic flexibility in Ge-containing zeolites: impact on diffusion'

\_symmetry\_space\_group\_name\_H-M 'P1'

\_symmetry\_Int\_Tables\_number 1

\_symmetry\_cell\_setting triclinic

loop\_

\_symmetry\_equiv\_pos\_as\_xyz

x,y,z

\_cell\_length\_a 11.9168

\_cell\_length\_b 11.9168

\_cell\_length\_c 11.9168

\_cell\_angle\_alpha 90.0000

\_cell\_angle\_beta 90.0000

\_cell\_angle\_gamma 90.0000

loop\_

\_atom\_site\_label

\_atom\_site\_type\_symbol

\_atom\_site\_fract\_x

\_atom\_site\_fract\_y

\_atom\_site\_fract\_z

\_atom\_site\_U\_iso\_or\_equiv

\_atom\_site\_adp\_type

\_atom\_site\_occupancy

|      |    |         |         |         |         |      |      |
|------|----|---------|---------|---------|---------|------|------|
| Si1  | Si | 0.00000 | 0.18307 | 0.36807 | 0.00000 | Uiso | 1.00 |
| Si2  | Si | 0.00000 | 0.81693 | 0.36807 | 0.00000 | Uiso | 1.00 |
| Si3  | Si | 0.00000 | 0.18307 | 0.63193 | 0.00000 | Uiso | 1.00 |
| Si4  | Si | 0.36807 | 0.00000 | 0.81693 | 0.00000 | Uiso | 1.00 |
| Si5  | Si | 0.18307 | 0.00000 | 0.63193 | 0.00000 | Uiso | 1.00 |
| Si6  | Si | 0.18307 | 0.00000 | 0.36807 | 0.00000 | Uiso | 1.00 |
| Si7  | Si | 0.81693 | 0.00000 | 0.36807 | 0.00000 | Uiso | 1.00 |
| Si8  | Si | 0.00000 | 0.81693 | 0.63193 | 0.00000 | Uiso | 1.00 |
| Si9  | Si | 0.36807 | 0.00000 | 0.18307 | 0.00000 | Uiso | 1.00 |
| Si10 | Si | 0.63193 | 0.00000 | 0.18307 | 0.00000 | Uiso | 1.00 |
| Si11 | Si | 0.63193 | 0.00000 | 0.81693 | 0.00000 | Uiso | 1.00 |
| Si12 | Si | 0.18307 | 0.36807 | 0.00000 | 0.00000 | Uiso | 1.00 |
| Si13 | Si | 0.81693 | 0.36807 | 0.00000 | 0.00000 | Uiso | 1.00 |
| Si14 | Si | 0.18307 | 0.63193 | 0.00000 | 0.00000 | Uiso | 1.00 |
| Si15 | Si | 0.81693 | 0.63193 | 0.00000 | 0.00000 | Uiso | 1.00 |
| Si16 | Si | 0.81693 | 0.00000 | 0.63193 | 0.00000 | Uiso | 1.00 |
| Si17 | Si | 0.00000 | 0.36807 | 0.81693 | 0.00000 | Uiso | 1.00 |

|      |    |         |         |         |         |      |      |
|------|----|---------|---------|---------|---------|------|------|
| Si18 | Si | 0.00000 | 0.36807 | 0.18307 | 0.00000 | Uiso | 1.00 |
| Si19 | Si | 0.00000 | 0.63193 | 0.81693 | 0.00000 | Uiso | 1.00 |
| Si20 | Si | 0.00000 | 0.63193 | 0.18307 | 0.00000 | Uiso | 1.00 |
| Si21 | Si | 0.36807 | 0.18307 | 0.00000 | 0.00000 | Uiso | 1.00 |
| Si22 | Si | 0.36807 | 0.81693 | 0.00000 | 0.00000 | Uiso | 1.00 |
| Si23 | Si | 0.63193 | 0.18307 | 0.00000 | 0.00000 | Uiso | 1.00 |
| Si24 | Si | 0.63193 | 0.81693 | 0.00000 | 0.00000 | Uiso | 1.00 |
| O25  | O  | 0.00000 | 0.21444 | 0.50000 | 0.00000 | Uiso | 1.00 |
| O26  | O  | 0.00000 | 0.78556 | 0.50000 | 0.00000 | Uiso | 1.00 |
| O27  | O  | 0.50000 | 0.00000 | 0.21444 | 0.00000 | Uiso | 1.00 |
| O28  | O  | 0.50000 | 0.00000 | 0.78556 | 0.00000 | Uiso | 1.00 |
| O29  | O  | 0.21444 | 0.50000 | 0.00000 | 0.00000 | Uiso | 1.00 |
| O30  | O  | 0.78556 | 0.50000 | 0.00000 | 0.00000 | Uiso | 1.00 |
| O31  | O  | 0.21444 | 0.00000 | 0.50000 | 0.00000 | Uiso | 1.00 |
| O32  | O  | 0.78556 | 0.00000 | 0.50000 | 0.00000 | Uiso | 1.00 |
| O33  | O  | 0.00000 | 0.50000 | 0.78556 | 0.00000 | Uiso | 1.00 |
| O34  | O  | 0.00000 | 0.50000 | 0.21444 | 0.00000 | Uiso | 1.00 |
| O35  | O  | 0.50000 | 0.21444 | 0.00000 | 0.00000 | Uiso | 1.00 |
| O36  | O  | 0.50000 | 0.78556 | 0.00000 | 0.00000 | Uiso | 1.00 |
| O37  | O  | 0.11160 | 0.11160 | 0.33664 | 0.00000 | Uiso | 1.00 |
| O38  | O  | 0.88840 | 0.88840 | 0.33664 | 0.00000 | Uiso | 1.00 |
| O39  | O  | 0.88840 | 0.11160 | 0.66336 | 0.00000 | Uiso | 1.00 |
| O40  | O  | 0.11160 | 0.88840 | 0.66336 | 0.00000 | Uiso | 1.00 |
| O41  | O  | 0.33664 | 0.11160 | 0.11160 | 0.00000 | Uiso | 1.00 |
| O42  | O  | 0.33664 | 0.88840 | 0.88840 | 0.00000 | Uiso | 1.00 |
| O43  | O  | 0.66336 | 0.88840 | 0.11160 | 0.00000 | Uiso | 1.00 |
| O44  | O  | 0.66336 | 0.11160 | 0.88840 | 0.00000 | Uiso | 1.00 |
| O45  | O  | 0.11160 | 0.33664 | 0.11160 | 0.00000 | Uiso | 1.00 |
| O46  | O  | 0.88840 | 0.33664 | 0.88840 | 0.00000 | Uiso | 1.00 |
| O47  | O  | 0.11160 | 0.66336 | 0.88840 | 0.00000 | Uiso | 1.00 |
| O48  | O  | 0.88840 | 0.66336 | 0.11160 | 0.00000 | Uiso | 1.00 |
| O49  | O  | 0.11160 | 0.11160 | 0.66336 | 0.00000 | Uiso | 1.00 |
| O50  | O  | 0.88840 | 0.88840 | 0.66336 | 0.00000 | Uiso | 1.00 |
| O51  | O  | 0.11160 | 0.88840 | 0.33664 | 0.00000 | Uiso | 1.00 |
| O52  | O  | 0.88840 | 0.11160 | 0.33664 | 0.00000 | Uiso | 1.00 |
| O53  | O  | 0.11160 | 0.33664 | 0.88840 | 0.00000 | Uiso | 1.00 |
| O54  | O  | 0.88840 | 0.33664 | 0.11160 | 0.00000 | Uiso | 1.00 |
| O55  | O  | 0.88840 | 0.66336 | 0.88840 | 0.00000 | Uiso | 1.00 |
| O56  | O  | 0.11160 | 0.66336 | 0.11160 | 0.00000 | Uiso | 1.00 |
| O57  | O  | 0.33664 | 0.11160 | 0.88840 | 0.00000 | Uiso | 1.00 |
| O58  | O  | 0.33664 | 0.88840 | 0.11160 | 0.00000 | Uiso | 1.00 |
| O59  | O  | 0.66336 | 0.11160 | 0.11160 | 0.00000 | Uiso | 1.00 |
| O60  | O  | 0.66336 | 0.88840 | 0.88840 | 0.00000 | Uiso | 1.00 |
| O61  | O  | 0.00000 | 0.29859 | 0.29859 | 0.00000 | Uiso | 1.00 |
| O62  | O  | 0.00000 | 0.70141 | 0.29859 | 0.00000 | Uiso | 1.00 |
| O63  | O  | 0.00000 | 0.29859 | 0.70141 | 0.00000 | Uiso | 1.00 |
| O64  | O  | 0.00000 | 0.70141 | 0.70141 | 0.00000 | Uiso | 1.00 |
| O65  | O  | 0.29859 | 0.00000 | 0.29859 | 0.00000 | Uiso | 1.00 |
| O66  | O  | 0.29859 | 0.00000 | 0.70141 | 0.00000 | Uiso | 1.00 |
| O67  | O  | 0.70141 | 0.00000 | 0.29859 | 0.00000 | Uiso | 1.00 |

|     |   |         |         |         |         |      |      |
|-----|---|---------|---------|---------|---------|------|------|
| O68 | O | 0.70141 | 0.00000 | 0.70141 | 0.00000 | Uiso | 1.00 |
| O69 | O | 0.29859 | 0.29859 | 0.00000 | 0.00000 | Uiso | 1.00 |
| O70 | O | 0.70141 | 0.29859 | 0.00000 | 0.00000 | Uiso | 1.00 |
| O71 | O | 0.29859 | 0.70141 | 0.00000 | 0.00000 | Uiso | 1.00 |
| O72 | O | 0.70141 | 0.70141 | 0.00000 | 0.00000 | Uiso | 1.00 |

## Crystallographic data of modeled S1 (SiGe-ITQ-29)

data\_s1

\_audit\_creation\_date 2015-07-30  
\_audit\_creation\_method 'VASP code'  
\_audit\_author\_name 'A. Rabdel Ruiz Salvador'

\_citation\_author\_name 'Juan José Gutiérrez-Sevillano, Sofía Calero, Said Hamad, Salvador R. G. Balestra, Ricardo Grau-Crespo, Fernando Rey, Susana Valencia, Miguel Palomino and A. Rabdel Ruiz-Salvador'

\_citation\_title 'Critical role of dynamic flexibility in Ge-containing zeolites: impact on diffusion'

\_symmetry\_space\_group\_name\_H-M 'P1'

\_symmetry\_Int\_Tables\_number 1

\_symmetry\_cell\_setting triclinic

loop\_

\_symmetry\_equiv\_pos\_as\_xyz

x,y,z

\_cell\_length\_a 12.0992

\_cell\_length\_b 12.0992

\_cell\_length\_c 12.0992

\_cell\_angle\_alpha 90.0000

\_cell\_angle\_beta 90.0000

\_cell\_angle\_gamma 90.0000

loop\_

\_atom\_site\_label

\_atom\_site\_type\_symbol

\_atom\_site\_fract\_x

\_atom\_site\_fract\_y

\_atom\_site\_fract\_z

\_atom\_site\_U\_iso\_or\_equiv

\_atom\_site\_adp\_type

\_atom\_site\_occupancy

|      |    |         |         |         |         |      |      |
|------|----|---------|---------|---------|---------|------|------|
| Ge1  | Ge | 0.00141 | 0.18748 | 0.35883 | 0.00000 | Uiso | 1.00 |
| Ge2  | Ge | 0.00126 | 0.80624 | 0.36711 | 0.00000 | Uiso | 1.00 |
| Ge3  | Ge | 0.00483 | 0.18646 | 0.64033 | 0.00000 | Uiso | 1.00 |
| Ge4  | Ge | 0.37293 | 0.99819 | 0.81564 | 0.00000 | Uiso | 1.00 |
| Ge5  | Ge | 0.18194 | 0.99827 | 0.63760 | 0.00000 | Uiso | 1.00 |
| Ge6  | Ge | 0.18040 | 0.99915 | 0.35021 | 0.00000 | Uiso | 1.00 |
| Ge7  | Ge | 0.80805 | 0.99983 | 0.36927 | 0.00000 | Uiso | 1.00 |
| Si8  | Si | 0.00491 | 0.81359 | 0.63828 | 0.00000 | Uiso | 1.00 |
| Si9  | Si | 0.36692 | 0.00117 | 0.17286 | 0.00000 | Uiso | 1.00 |
| Si10 | Si | 0.63123 | 0.00010 | 0.17748 | 0.00000 | Uiso | 1.00 |
| Si11 | Si | 0.64154 | 0.99726 | 0.82630 | 0.00000 | Uiso | 1.00 |
| Si12 | Si | 0.18260 | 0.36814 | 0.00022 | 0.00000 | Uiso | 1.00 |
| Si13 | Si | 0.81581 | 0.36788 | 0.00194 | 0.00000 | Uiso | 1.00 |
| Si14 | Si | 0.18122 | 0.63349 | 0.00357 | 0.00000 | Uiso | 1.00 |
| Si15 | Si | 0.81465 | 0.63208 | 0.00584 | 0.00000 | Uiso | 1.00 |
| Si16 | Si | 0.82021 | 0.00007 | 0.63721 | 0.00000 | Uiso | 1.00 |
| Si17 | Si | 0.99962 | 0.37441 | 0.82280 | 0.00000 | Uiso | 1.00 |

|      |    |         |         |         |         |      |      |
|------|----|---------|---------|---------|---------|------|------|
| Si18 | Si | 0.99948 | 0.36659 | 0.17310 | 0.00000 | Uiso | 1.00 |
| Si19 | Si | 0.99795 | 0.63570 | 0.82644 | 0.00000 | Uiso | 1.00 |
| Si20 | Si | 0.99833 | 0.63138 | 0.17677 | 0.00000 | Uiso | 1.00 |
| Si21 | Si | 0.36726 | 0.18540 | 0.99802 | 0.00000 | Uiso | 1.00 |
| Si22 | Si | 0.36652 | 0.81422 | 0.00158 | 0.00000 | Uiso | 1.00 |
| Si23 | Si | 0.63375 | 0.18245 | 0.00169 | 0.00000 | Uiso | 1.00 |
| Si24 | Si | 0.63205 | 0.81530 | 0.00640 | 0.00000 | Uiso | 1.00 |
| O25  | O  | 0.02534 | 0.21522 | 0.49932 | 0.00000 | Uiso | 1.00 |
| O26  | O  | 0.01329 | 0.77870 | 0.50905 | 0.00000 | Uiso | 1.00 |
| O27  | O  | 0.49869 | 0.00035 | 0.18766 | 0.00000 | Uiso | 1.00 |
| O28  | O  | 0.51414 | 0.99984 | 0.78783 | 0.00000 | Uiso | 1.00 |
| O29  | O  | 0.20550 | 0.50091 | 0.00590 | 0.00000 | Uiso | 1.00 |
| O30  | O  | 0.78908 | 0.49983 | 0.00878 | 0.00000 | Uiso | 1.00 |
| O31  | O  | 0.17130 | 0.01819 | 0.49400 | 0.00000 | Uiso | 1.00 |
| O32  | O  | 0.77676 | 0.00179 | 0.51062 | 0.00000 | Uiso | 1.00 |
| O33  | O  | 0.00038 | 0.50548 | 0.79872 | 0.00000 | Uiso | 1.00 |
| O34  | O  | 0.99982 | 0.49891 | 0.18324 | 0.00000 | Uiso | 1.00 |
| O35  | O  | 0.50070 | 0.20631 | 0.00050 | 0.00000 | Uiso | 1.00 |
| O36  | O  | 0.49930 | 0.79161 | 0.00693 | 0.00000 | Uiso | 1.00 |
| O37  | O  | 0.10976 | 0.11374 | 0.29244 | 0.00000 | Uiso | 1.00 |
| O38  | O  | 0.87856 | 0.87745 | 0.33028 | 0.00000 | Uiso | 1.00 |
| O39  | O  | 0.88126 | 0.11547 | 0.66921 | 0.00000 | Uiso | 1.00 |
| O40  | O  | 0.11859 | 0.87376 | 0.67909 | 0.00000 | Uiso | 1.00 |
| O41  | O  | 0.33094 | 0.11178 | 0.10506 | 0.00000 | Uiso | 1.00 |
| O42  | O  | 0.33304 | 0.87697 | 0.88658 | 0.00000 | Uiso | 1.00 |
| O43  | O  | 0.66859 | 0.88721 | 0.11430 | 0.00000 | Uiso | 1.00 |
| O44  | O  | 0.66975 | 0.10980 | 0.89426 | 0.00000 | Uiso | 1.00 |
| O45  | O  | 0.11040 | 0.32847 | 0.10690 | 0.00000 | Uiso | 1.00 |
| O46  | O  | 0.88864 | 0.34175 | 0.89175 | 0.00000 | Uiso | 1.00 |
| O47  | O  | 0.11038 | 0.66702 | 0.89380 | 0.00000 | Uiso | 1.00 |
| O48  | O  | 0.88588 | 0.67008 | 0.11370 | 0.00000 | Uiso | 1.00 |
| O49  | O  | 0.11805 | 0.11465 | 0.70019 | 0.00000 | Uiso | 1.00 |
| O50  | O  | 0.90051 | 0.89497 | 0.65766 | 0.00000 | Uiso | 1.00 |
| O51  | O  | 0.12063 | 0.87118 | 0.31182 | 0.00000 | Uiso | 1.00 |
| O52  | O  | 0.87331 | 0.12380 | 0.32741 | 0.00000 | Uiso | 1.00 |
| O53  | O  | 0.11158 | 0.33973 | 0.88927 | 0.00000 | Uiso | 1.00 |
| O54  | O  | 0.88749 | 0.32845 | 0.10892 | 0.00000 | Uiso | 1.00 |
| O55  | O  | 0.88680 | 0.66366 | 0.89681 | 0.00000 | Uiso | 1.00 |
| O56  | O  | 0.10914 | 0.67109 | 0.11126 | 0.00000 | Uiso | 1.00 |
| O57  | O  | 0.33161 | 0.11991 | 0.88505 | 0.00000 | Uiso | 1.00 |
| O58  | O  | 0.32913 | 0.89052 | 0.10624 | 0.00000 | Uiso | 1.00 |
| O59  | O  | 0.66817 | 0.11154 | 0.11128 | 0.00000 | Uiso | 1.00 |
| O60  | O  | 0.66623 | 0.88672 | 0.89815 | 0.00000 | Uiso | 1.00 |
| O61  | O  | 0.99900 | 0.31869 | 0.29788 | 0.00000 | Uiso | 1.00 |
| O62  | O  | 0.99700 | 0.67667 | 0.30281 | 0.00000 | Uiso | 1.00 |
| O63  | O  | 0.99703 | 0.31650 | 0.70243 | 0.00000 | Uiso | 1.00 |
| O64  | O  | 0.99210 | 0.70309 | 0.71146 | 0.00000 | Uiso | 1.00 |
| O65  | O  | 0.31534 | 0.00108 | 0.29722 | 0.00000 | Uiso | 1.00 |
| O66  | O  | 0.32094 | 0.99456 | 0.67924 | 0.00000 | Uiso | 1.00 |
| O67  | O  | 0.68006 | 0.99964 | 0.30195 | 0.00000 | Uiso | 1.00 |

|     |   |         |         |         |         |      |      |
|-----|---|---------|---------|---------|---------|------|------|
| O68 | O | 0.71368 | 0.99023 | 0.71525 | 0.00000 | Uiso | 1.00 |
| O69 | O | 0.29958 | 0.30155 | 0.99943 | 0.00000 | Uiso | 1.00 |
| O70 | O | 0.70059 | 0.29885 | 0.99962 | 0.00000 | Uiso | 1.00 |
| O71 | O | 0.29871 | 0.69854 | 0.00445 | 0.00000 | Uiso | 1.00 |
| O72 | O | 0.69837 | 0.69890 | 0.00480 | 0.00000 | Uiso | 1.00 |



## Crystallographic data of modeled S2 (SiGe-ITQ-29)

data\_s2

\_audit\_creation\_date 2015-07-30  
\_audit\_creation\_method 'VASP code'  
\_audit\_author\_name 'A. Rabdel Ruiz Salvador'

\_citation\_author\_name 'Juan José Gutiérrez-Sevillano, Sofía Calero, Said Hamad, Salvador R. G. Balestra, Ricardo Grau-Crespo, Fernando Rey, Susana Valencia, Miguel Palomino and A. Rabdel Ruiz-Salvador'

\_citation\_title 'Critical role of dynamic flexibility in Ge-containing zeolites: impact on diffusion'

\_symmetry\_space\_group\_name\_H-M 'P1'

\_symmetry\_Int\_Tables\_number 1

\_symmetry\_cell\_setting triclinic

loop\_

\_symmetry\_equiv\_pos\_as\_xyz

x,y,z

\_cell\_length\_a 12.0384

\_cell\_length\_b 12.0384

\_cell\_length\_c 12.0384

\_cell\_angle\_alpha 90.0000

\_cell\_angle\_beta 90.0000

\_cell\_angle\_gamma 90.0000

loop\_

\_atom\_site\_label

\_atom\_site\_type\_symbol

\_atom\_site\_fract\_x

\_atom\_site\_fract\_y

\_atom\_site\_fract\_z

\_atom\_site\_U\_iso\_or\_equiv

\_atom\_site\_adp\_type

\_atom\_site\_occupancy

|      |    |         |         |         |         |      |      |
|------|----|---------|---------|---------|---------|------|------|
| Ge1  | Ge | 0.00067 | 0.18092 | 0.36364 | 0.00000 | Uiso | 1.00 |
| Ge2  | Ge | 0.99963 | 0.81625 | 0.36901 | 0.00000 | Uiso | 1.00 |
| Ge3  | Ge | 0.36839 | 0.00223 | 0.81399 | 0.00000 | Uiso | 1.00 |
| Ge4  | Ge | 0.18007 | 0.36690 | 0.00122 | 0.00000 | Uiso | 1.00 |
| Ge5  | Ge | 0.17855 | 0.00096 | 0.63470 | 0.00000 | Uiso | 1.00 |
| Ge6  | Ge | 0.99909 | 0.63761 | 0.17856 | 0.00000 | Uiso | 1.00 |
| Ge7  | Ge | 0.36787 | 0.18423 | 0.00123 | 0.00000 | Uiso | 1.00 |
| Si8  | Si | 0.99977 | 0.18453 | 0.63724 | 0.00000 | Uiso | 1.00 |
| Si9  | Si | 0.99977 | 0.81812 | 0.64315 | 0.00000 | Uiso | 1.00 |
| Si10 | Si | 0.36769 | 0.99710 | 0.18269 | 0.00000 | Uiso | 1.00 |
| Si11 | Si | 0.63355 | 0.99711 | 0.18144 | 0.00000 | Uiso | 1.00 |
| Si12 | Si | 0.64378 | 0.00096 | 0.82191 | 0.00000 | Uiso | 1.00 |
| Si13 | Si | 0.81691 | 0.36838 | 0.00226 | 0.00000 | Uiso | 1.00 |
| Si14 | Si | 0.17921 | 0.64420 | 0.99982 | 0.00000 | Uiso | 1.00 |
| Si15 | Si | 0.81142 | 0.63120 | 0.00201 | 0.00000 | Uiso | 1.00 |
| Si16 | Si | 0.81830 | 0.99948 | 0.63217 | 0.00000 | Uiso | 1.00 |
| Si17 | Si | 0.18099 | 0.99811 | 0.35522 | 0.00000 | Uiso | 1.00 |

|      |    |         |         |         |         |      |      |
|------|----|---------|---------|---------|---------|------|------|
| Si18 | Si | 0.80979 | 0.99679 | 0.36811 | 0.00000 | Uiso | 1.00 |
| Si19 | Si | 0.99887 | 0.36909 | 0.81636 | 0.00000 | Uiso | 1.00 |
| Si20 | Si | 0.99964 | 0.36120 | 0.17801 | 0.00000 | Uiso | 1.00 |
| Si21 | Si | 0.99947 | 0.63220 | 0.82087 | 0.00000 | Uiso | 1.00 |
| Si22 | Si | 0.36779 | 0.81687 | 0.99915 | 0.00000 | Uiso | 1.00 |
| Si23 | Si | 0.64454 | 0.17639 | 0.00144 | 0.00000 | Uiso | 1.00 |
| Si24 | Si | 0.63303 | 0.81720 | 0.99897 | 0.00000 | Uiso | 1.00 |
| O25  | O  | 0.01256 | 0.20849 | 0.50584 | 0.00000 | Uiso | 1.00 |
| O26  | O  | 0.01428 | 0.79637 | 0.51187 | 0.00000 | Uiso | 1.00 |
| O27  | O  | 0.50058 | 0.00212 | 0.20162 | 0.00000 | Uiso | 1.00 |
| O28  | O  | 0.51224 | 0.01076 | 0.79906 | 0.00000 | Uiso | 1.00 |
| O29  | O  | 0.19203 | 0.51140 | 0.01122 | 0.00000 | Uiso | 1.00 |
| O30  | O  | 0.78541 | 0.49921 | 0.00919 | 0.00000 | Uiso | 1.00 |
| O31  | O  | 0.18467 | 0.99855 | 0.48924 | 0.00000 | Uiso | 1.00 |
| O32  | O  | 0.78804 | 0.99767 | 0.50094 | 0.00000 | Uiso | 1.00 |
| O33  | O  | 0.00763 | 0.50108 | 0.79197 | 0.00000 | Uiso | 1.00 |
| O34  | O  | 0.01462 | 0.49372 | 0.18418 | 0.00000 | Uiso | 1.00 |
| O35  | O  | 0.51227 | 0.19667 | 0.99589 | 0.00000 | Uiso | 1.00 |
| O36  | O  | 0.50032 | 0.79453 | 0.99571 | 0.00000 | Uiso | 1.00 |
| O37  | O  | 0.11919 | 0.11134 | 0.31218 | 0.00000 | Uiso | 1.00 |
| O38  | O  | 0.87514 | 0.88374 | 0.33195 | 0.00000 | Uiso | 1.00 |
| O39  | O  | 0.89004 | 0.10980 | 0.66128 | 0.00000 | Uiso | 1.00 |
| O40  | O  | 0.10941 | 0.88361 | 0.68937 | 0.00000 | Uiso | 1.00 |
| O41  | O  | 0.32474 | 0.10922 | 0.11951 | 0.00000 | Uiso | 1.00 |
| O42  | O  | 0.32752 | 0.88268 | 0.88773 | 0.00000 | Uiso | 1.00 |
| O43  | O  | 0.66465 | 0.88514 | 0.11179 | 0.00000 | Uiso | 1.00 |
| O44  | O  | 0.68607 | 0.10798 | 0.89254 | 0.00000 | Uiso | 1.00 |
| O45  | O  | 0.10834 | 0.30876 | 0.11548 | 0.00000 | Uiso | 1.00 |
| O46  | O  | 0.88924 | 0.34422 | 0.89101 | 0.00000 | Uiso | 1.00 |
| O47  | O  | 0.11018 | 0.67284 | 0.88702 | 0.00000 | Uiso | 1.00 |
| O48  | O  | 0.87281 | 0.67526 | 0.11463 | 0.00000 | Uiso | 1.00 |
| O49  | O  | 0.11152 | 0.12218 | 0.68325 | 0.00000 | Uiso | 1.00 |
| O50  | O  | 0.88776 | 0.88926 | 0.66664 | 0.00000 | Uiso | 1.00 |
| O51  | O  | 0.11440 | 0.88769 | 0.31255 | 0.00000 | Uiso | 1.00 |
| O52  | O  | 0.87826 | 0.10745 | 0.33070 | 0.00000 | Uiso | 1.00 |
| O53  | O  | 0.11216 | 0.32606 | 0.87766 | 0.00000 | Uiso | 1.00 |
| O54  | O  | 0.88690 | 0.33027 | 0.11097 | 0.00000 | Uiso | 1.00 |
| O55  | O  | 0.88875 | 0.65633 | 0.89433 | 0.00000 | Uiso | 1.00 |
| O56  | O  | 0.11367 | 0.69534 | 0.10756 | 0.00000 | Uiso | 1.00 |
| O57  | O  | 0.31409 | 0.12316 | 0.87827 | 0.00000 | Uiso | 1.00 |
| O58  | O  | 0.33698 | 0.88714 | 0.11040 | 0.00000 | Uiso | 1.00 |
| O59  | O  | 0.67491 | 0.10641 | 0.11323 | 0.00000 | Uiso | 1.00 |
| O60  | O  | 0.67128 | 0.88787 | 0.89036 | 0.00000 | Uiso | 1.00 |
| O61  | O  | 0.99206 | 0.31285 | 0.30321 | 0.00000 | Uiso | 1.00 |
| O62  | O  | 0.99715 | 0.67932 | 0.31832 | 0.00000 | Uiso | 1.00 |
| O63  | O  | 0.98789 | 0.30234 | 0.70048 | 0.00000 | Uiso | 1.00 |
| O64  | O  | 0.99083 | 0.69999 | 0.70561 | 0.00000 | Uiso | 1.00 |
| O65  | O  | 0.30454 | 0.99312 | 0.30169 | 0.00000 | Uiso | 1.00 |
| O66  | O  | 0.31862 | 0.99708 | 0.67645 | 0.00000 | Uiso | 1.00 |
| O67  | O  | 0.69276 | 0.99598 | 0.30208 | 0.00000 | Uiso | 1.00 |

|     |   |         |         |         |         |      |      |
|-----|---|---------|---------|---------|---------|------|------|
| O68 | O | 0.70451 | 0.99988 | 0.70252 | 0.00000 | Uiso | 1.00 |
| O69 | O | 0.31929 | 0.32206 | 0.00546 | 0.00000 | Uiso | 1.00 |
| O70 | O | 0.70389 | 0.29658 | 0.00091 | 0.00000 | Uiso | 1.00 |
| O71 | O | 0.30151 | 0.69998 | 0.99846 | 0.00000 | Uiso | 1.00 |
| O72 | O | 0.69552 | 0.69845 | 0.99453 | 0.00000 | Uiso | 1.00 |

## Crystallographic data of modeled S3 (SiGe-ITQ-29)

data\_s3

\_audit\_creation\_date 2015-07-30  
\_audit\_creation\_method 'VASP code'  
\_audit\_author\_name 'A. Rabdel Ruiz Salvador'

\_citation\_author\_name 'Juan José Gutiérrez-Sevillano, Sofía Calero, Said Hamad, Salvador R. G. Balestra, Ricardo Grau-Crespo, Fernando Rey, Susana Valencia, Miguel Palomino and A. Rabdel Ruiz-Salvador'

\_citation\_title 'Critical role of dynamic flexibility in Ge-containing zeolites: impact on diffusion'

\_symmetry\_space\_group\_name\_H-M 'P1'

\_symmetry\_Int\_Tables\_number 1

\_symmetry\_cell\_setting triclinic

loop\_

\_symmetry\_equiv\_pos\_as\_xyz

x,y,z

\_cell\_length\_a 12.0384

\_cell\_length\_b 12.0384

\_cell\_length\_c 12.0384

\_cell\_angle\_alpha 90.0000

\_cell\_angle\_beta 90.0000

\_cell\_angle\_gamma 90.0000

loop\_

\_atom\_site\_label

\_atom\_site\_type\_symbol

\_atom\_site\_fract\_x

\_atom\_site\_fract\_y

\_atom\_site\_fract\_z

\_atom\_site\_U\_iso\_or\_equiv

\_atom\_site\_adp\_type

\_atom\_site\_occupancy

|      |    |         |         |         |         |      |      |
|------|----|---------|---------|---------|---------|------|------|
| Ge1  | Ge | 0.99950 | 0.18074 | 0.35458 | 0.00000 | Uiso | 1.00 |
| Ge2  | Ge | 0.99917 | 0.81483 | 0.36204 | 0.00000 | Uiso | 1.00 |
| Ge3  | Ge | 0.00017 | 0.18290 | 0.63566 | 0.00000 | Uiso | 1.00 |
| Ge4  | Ge | 0.99977 | 0.81660 | 0.63893 | 0.00000 | Uiso | 1.00 |
| Ge5  | Ge | 0.18560 | 0.35743 | 0.00043 | 0.00000 | Uiso | 1.00 |
| Ge6  | Ge | 0.18245 | 0.64325 | 0.99958 | 0.00000 | Uiso | 1.00 |
| Ge7  | Ge | 0.99710 | 0.36349 | 0.82322 | 0.00000 | Uiso | 1.00 |
| Si8  | Si | 0.36802 | 0.99871 | 0.18273 | 0.00000 | Uiso | 1.00 |
| Si9  | Si | 0.36831 | 0.00187 | 0.81811 | 0.00000 | Uiso | 1.00 |
| Si10 | Si | 0.63404 | 0.99895 | 0.18250 | 0.00000 | Uiso | 1.00 |
| Si11 | Si | 0.63471 | 0.00225 | 0.81948 | 0.00000 | Uiso | 1.00 |
| Si12 | Si | 0.80813 | 0.36818 | 0.99998 | 0.00000 | Uiso | 1.00 |
| Si13 | Si | 0.81165 | 0.63257 | 0.00016 | 0.00000 | Uiso | 1.00 |
| Si14 | Si | 0.18749 | 0.00098 | 0.63480 | 0.00000 | Uiso | 1.00 |
| Si15 | Si | 0.81165 | 0.00214 | 0.63428 | 0.00000 | Uiso | 1.00 |
| Si16 | Si | 0.18708 | 0.99941 | 0.36433 | 0.00000 | Uiso | 1.00 |
| Si17 | Si | 0.81093 | 0.99967 | 0.36583 | 0.00000 | Uiso | 1.00 |

|      |    |         |         |         |         |      |      |
|------|----|---------|---------|---------|---------|------|------|
| Si18 | Si | 0.99765 | 0.36719 | 0.17523 | 0.00000 | Uiso | 1.00 |
| Si19 | Si | 0.99804 | 0.63947 | 0.82736 | 0.00000 | Uiso | 1.00 |
| Si20 | Si | 0.99735 | 0.63301 | 0.17674 | 0.00000 | Uiso | 1.00 |
| Si21 | Si | 0.37045 | 0.17577 | 0.00149 | 0.00000 | Uiso | 1.00 |
| Si22 | Si | 0.37115 | 0.82325 | 0.99979 | 0.00000 | Uiso | 1.00 |
| Si23 | Si | 0.63670 | 0.17729 | 0.00228 | 0.00000 | Uiso | 1.00 |
| Si24 | Si | 0.63664 | 0.82245 | 0.00027 | 0.00000 | Uiso | 1.00 |
| O25  | O  | 0.00664 | 0.21271 | 0.49491 | 0.00000 | Uiso | 1.00 |
| O26  | O  | 0.00458 | 0.77377 | 0.50075 | 0.00000 | Uiso | 1.00 |
| O27  | O  | 0.50105 | 0.00012 | 0.20176 | 0.00000 | Uiso | 1.00 |
| O28  | O  | 0.50162 | 0.00310 | 0.79917 | 0.00000 | Uiso | 1.00 |
| O29  | O  | 0.21160 | 0.50053 | 0.99469 | 0.00000 | Uiso | 1.00 |
| O30  | O  | 0.78311 | 0.50065 | 0.99786 | 0.00000 | Uiso | 1.00 |
| O31  | O  | 0.20059 | 0.00249 | 0.49951 | 0.00000 | Uiso | 1.00 |
| O32  | O  | 0.79550 | 0.00415 | 0.50004 | 0.00000 | Uiso | 1.00 |
| O33  | O  | 0.01808 | 0.50703 | 0.82803 | 0.00000 | Uiso | 1.00 |
| O34  | O  | 0.01031 | 0.49997 | 0.18499 | 0.00000 | Uiso | 1.00 |
| O35  | O  | 0.50350 | 0.19060 | 0.00164 | 0.00000 | Uiso | 1.00 |
| O36  | O  | 0.50387 | 0.80422 | 0.99944 | 0.00000 | Uiso | 1.00 |
| O37  | O  | 0.12181 | 0.10895 | 0.31726 | 0.00000 | Uiso | 1.00 |
| O38  | O  | 0.87672 | 0.88755 | 0.32849 | 0.00000 | Uiso | 1.00 |
| O39  | O  | 0.87803 | 0.11273 | 0.67573 | 0.00000 | Uiso | 1.00 |
| O40  | O  | 0.12192 | 0.88916 | 0.67519 | 0.00000 | Uiso | 1.00 |
| O41  | O  | 0.33142 | 0.10790 | 0.11186 | 0.00000 | Uiso | 1.00 |
| O42  | O  | 0.33416 | 0.89189 | 0.88914 | 0.00000 | Uiso | 1.00 |
| O43  | O  | 0.67116 | 0.88899 | 0.11294 | 0.00000 | Uiso | 1.00 |
| O44  | O  | 0.67321 | 0.11194 | 0.88931 | 0.00000 | Uiso | 1.00 |
| O45  | O  | 0.10882 | 0.31537 | 0.11807 | 0.00000 | Uiso | 1.00 |
| O46  | O  | 0.86995 | 0.32781 | 0.88623 | 0.00000 | Uiso | 1.00 |
| O47  | O  | 0.10678 | 0.69613 | 0.88542 | 0.00000 | Uiso | 1.00 |
| O48  | O  | 0.88409 | 0.66289 | 0.10987 | 0.00000 | Uiso | 1.00 |
| O49  | O  | 0.12104 | 0.11133 | 0.67789 | 0.00000 | Uiso | 1.00 |
| O50  | O  | 0.87819 | 0.89079 | 0.67263 | 0.00000 | Uiso | 1.00 |
| O51  | O  | 0.12097 | 0.88751 | 0.32498 | 0.00000 | Uiso | 1.00 |
| O52  | O  | 0.87711 | 0.10851 | 0.31998 | 0.00000 | Uiso | 1.00 |
| O53  | O  | 0.11597 | 0.30091 | 0.88328 | 0.00000 | Uiso | 1.00 |
| O54  | O  | 0.88591 | 0.33764 | 0.10584 | 0.00000 | Uiso | 1.00 |
| O55  | O  | 0.88298 | 0.66827 | 0.89139 | 0.00000 | Uiso | 1.00 |
| O56  | O  | 0.10820 | 0.68500 | 0.11894 | 0.00000 | Uiso | 1.00 |
| O57  | O  | 0.33177 | 0.11153 | 0.88869 | 0.00000 | Uiso | 1.00 |
| O58  | O  | 0.33370 | 0.88860 | 0.11221 | 0.00000 | Uiso | 1.00 |
| O59  | O  | 0.67297 | 0.10831 | 0.11290 | 0.00000 | Uiso | 1.00 |
| O60  | O  | 0.67143 | 0.89225 | 0.88955 | 0.00000 | Uiso | 1.00 |
| O61  | O  | 0.98946 | 0.31419 | 0.29800 | 0.00000 | Uiso | 1.00 |
| O62  | O  | 0.99031 | 0.68382 | 0.30025 | 0.00000 | Uiso | 1.00 |
| O63  | O  | 0.99336 | 0.32066 | 0.68439 | 0.00000 | Uiso | 1.00 |
| O64  | O  | 0.99076 | 0.68603 | 0.70209 | 0.00000 | Uiso | 1.00 |
| O65  | O  | 0.30733 | 0.99795 | 0.30330 | 0.00000 | Uiso | 1.00 |
| O66  | O  | 0.30702 | 0.00093 | 0.69761 | 0.00000 | Uiso | 1.00 |
| O67  | O  | 0.69141 | 0.99835 | 0.30436 | 0.00000 | Uiso | 1.00 |

|     |   |         |         |         |         |      |      |
|-----|---|---------|---------|---------|---------|------|------|
| O68 | O | 0.69321 | 0.00148 | 0.69798 | 0.00000 | Uiso | 1.00 |
| O69 | O | 0.31886 | 0.29980 | 0.00493 | 0.00000 | Uiso | 1.00 |
| O70 | O | 0.69299 | 0.29939 | 0.00693 | 0.00000 | Uiso | 1.00 |
| O71 | O | 0.31554 | 0.70108 | 0.99939 | 0.00000 | Uiso | 1.00 |
| O72 | O | 0.69729 | 0.70260 | 0.00039 | 0.00000 | Uiso | 1.00 |

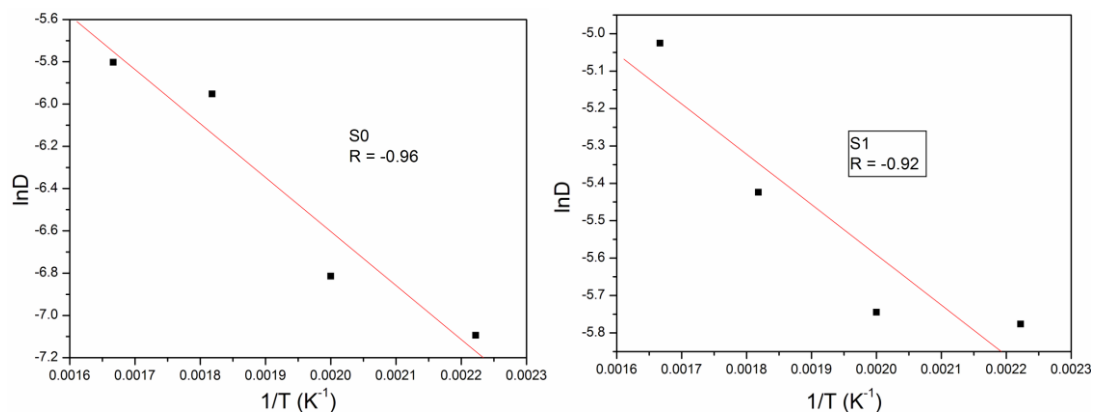

**Figure S1.** Arrhenius fit of the diffusion coefficients obtained at different temperatures for Si-ITQ-29 (top) and SiGe-ITQ-29 (bottom) frameworks.
